# Supplementary material
Source: PubMed Central journal article supplement (PMC4917366)
Supplement: NIHMS790220-supplement-Supplemental_fig_1.pdf [file NIHMS790220-supplement-Supplemental_fig_1.pdf]

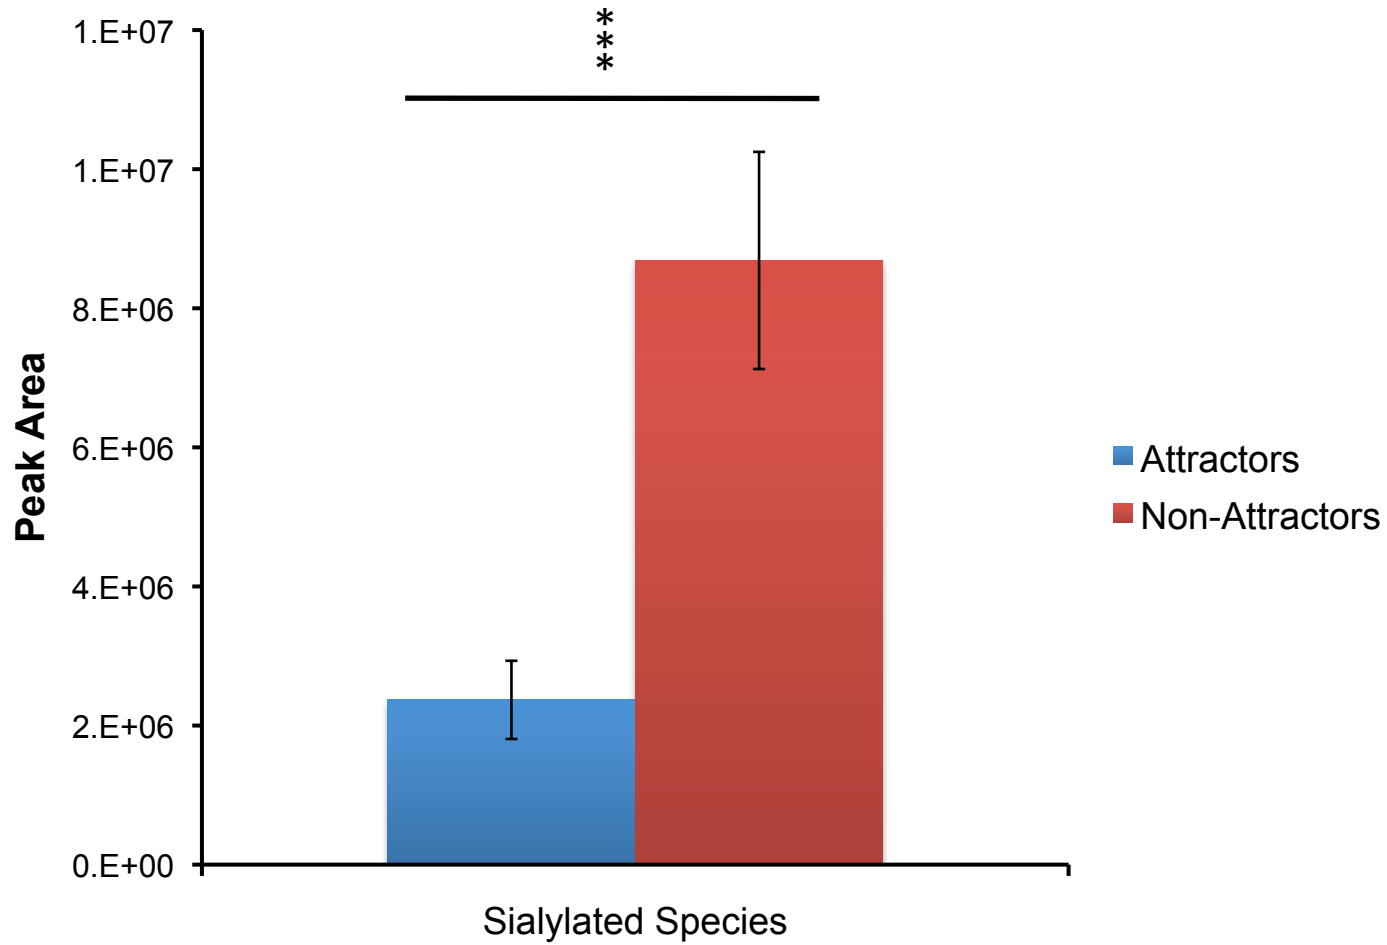

**Supplemental Figure 1.** The mean  $\pm$  SEM of all sialic acid containing N-glycan species in attractors vs non-attractors ( $p = 0.000131735$ ; Student's *t*-test)
